# Supplementary material for: A Nutritionally Complete Oral Nutritional Supplement Powder Improved Nutritional Outcomes in Free-Living Adults at Risk of Malnutrition: A Randomized Controlled Trial
Source: MDPI journal article supplement (doi:10.3390/ijerph191811354), 2022-09-09
Supplement: s1 [file s1]

**Supplementary Table S1.** Nutrient composition of study product.

| Nutrient                                | per 100 g Powder | per Serving (4.5 Scoops/69 g Powder) |
|-----------------------------------------|------------------|--------------------------------------|
| Energy, kcal                            | 435              | 300                                  |
| Fat, g                                  | 14.5             | 10.0                                 |
| of which saturated fatty acids, g       | 1.19             | 0.82                                 |
| of which monounsaturated fatty acids, g | 9.54             | 6.58                                 |
| of which polyunsaturated fatty acids, g | 3.74             | 2.58                                 |
| Carbohydrate, g                         | 57.7             | 39.8                                 |
| of which sugars, g                      | 16.6             | 11.5                                 |
| of which lactose, g                     | ≤ 0.87           | ≤ 0.60                               |
| Fibre, g                                | 4.35             | 3.00                                 |
| Protein, g                              | 16.2             | 11.2                                 |
| Sodium, mg                              | 304              | 210                                  |
| Chloride, mg                            | 464              | 320                                  |
| Potassium, mg                           | 652              | 450                                  |
| Calcium, mg                             | 290              | 200                                  |
| Phosphorus, mg                          | 203              | 140                                  |
| Magnesium, mg                           | 101              | 70                                   |
| Iron, mg                                | 6.7              | 4.6                                  |
| Zinc, mg                                | 4.9              | 3.4                                  |
| Copper, µg                              | 696              | 480                                  |
| Iodine, µg                              | 61               | 42                                   |
| Selenium, µg                            | 31               | 21                                   |
| Manganese, mg                           | 1.57             | 1.08                                 |
| Chromium, µg                            | 31               | 21                                   |
| Molybdenum, µg                          | 41               | 28                                   |
| Fluoride, mg                            | 0.58             | 0.40                                 |
| Vitamin A, µg RE                        | 401              | 277                                  |
| of which β-Carotene, µg RE              | 97               | 67                                   |
| Vitamin D3, µg                          | 5.8              | 4.0                                  |

|                             |          |         |
|-----------------------------|----------|---------|
| Vitamin E, mg $\alpha$ -TE  | 7.8      | 5.4     |
| Vitamin K1, $\mu$ g         | 28       | 19      |
| Vitamin C, mg               | 57       | 39      |
| Thiamin (vitamin B1), mg    | 0.65     | 0.45    |
| Riboflavin (vitamin B2), mg | 0.70     | 0.48    |
| Vitamin B6, mg              | 0.8      | 0.6     |
| Niacin, mg/mg NE            | 7.5/10.3 | 5.2/7.1 |
| Folic Acid, $\mu$ g         | 61       | 42      |
| Vitamin B12, $\mu$ g        | 1.48     | 1.02    |
| Pantothenic Acid, mg        | 2.6      | 1.8     |
| Biotin, $\mu$ g             | 19.6     | 13.5    |
| Choline, mg                 | 159      | 110     |

RE, retinol equivalents;  $\alpha$  -TE, alpha-tocopherol equivalents; NE, niacin equivalents.

**Supplementary Table S2.** Micronutrient intakes at baseline, change from baseline and the estimated mean group difference in change from baseline between the intervention group ( $n = 42$ ) and control group ( $n = 40$ ).

|                            | Group        | Mean $\pm$ SD   | Change from Baseline, Mean $\pm$ SD | Between group Difference in Change from Baseline | P-value          |
|----------------------------|--------------|-----------------|-------------------------------------|--------------------------------------------------|------------------|
|                            |              | Baseline        | 12 weeks                            | Estimated Mean (95% CI) <sup>a</sup>             |                  |
| Vitamin A, RE              | Intervention | 889 $\pm$ 882   | 551 $\pm$ 1319                      | <b>645 (93, 1198)</b>                            | <b>0.023</b>     |
|                            | Control      | 1046 $\pm$ 996  | -94 $\pm$ 1186                      |                                                  |                  |
| Thiamin, mg                | Intervention | 1.16 $\pm$ 0.47 | 0.58 $\pm$ 0.56                     | <b>0.61 (0.38, 0.84)</b>                         | <b>&lt;0.001</b> |
|                            | Control      | 1.16 $\pm$ 0.51 | -0.03 $\pm$ 0.46                    |                                                  |                  |
| Riboflavin, mg             | Intervention | 1.27 $\pm$ 0.41 | 0.62 $\pm$ 0.48                     | <b>0.61 (0.40, 0.82)</b>                         | <b>&lt;0.001</b> |
|                            | Control      | 1.32 $\pm$ 0.44 | 0.01 $\pm$ 0.45                     |                                                  |                  |
| Niacin, mg NE              | Intervention | 23.6 $\pm$ 9.2  | 10.5 $\pm$ 10.5                     | <b>8.8 (4.2, 13.5)</b>                           | <b>&lt;0.001</b> |
|                            | Control      | 23.7 $\pm$ 10.6 | 1.7 $\pm$ 10.6                      |                                                  |                  |
| Vitamin B6, mg             | Intervention | 1.7 $\pm$ 0.6   | 0.7 $\pm$ 0.1                       | <b>0.7 (0.5, 1.0)</b>                            | <b>&lt;0.001</b> |
|                            | Control      | 1.7 $\pm$ 0.7   | -0.1 $\pm$ 0.5                      |                                                  |                  |
| Vitamin B12, $\mu$ g       | Intervention | 2.98 $\pm$ 2.37 | 2.36 $\pm$ 3.57                     | <b>2.43 (1.01, 3.85)</b>                         | <b>0.001</b>     |
|                            | Control      | 3.61 $\pm$ 2.19 | -0.07 $\pm$ 2.81                    |                                                  |                  |
| Biotin, $\mu$ g            | Intervention | 16.8 $\pm$ 10.5 | 22.5 $\pm$ 10.1                     | <b>22.0 (18.2, 25.8)</b>                         | <b>&lt;0.001</b> |
|                            | Control      | 16.7 $\pm$ 7.2  | 0.5 $\pm$ 7.1                       |                                                  |                  |
| Vitamin C, mg              | Intervention | 112 $\pm$ 72    | 54 $\pm$ 78                         | <b>51 (20, 83)</b>                               | <b>0.002</b>     |
|                            | Control      | 111 $\pm$ 67    | 3 $\pm$ 66                          |                                                  |                  |
| Vitamin E, mg $\alpha$ -TE | Intervention | 5.9 $\pm$ 2.6   | 9.9 $\pm$ 3.0                       | <b>9.5 (8.2, 10.8)</b>                           | <b>&lt;0.001</b> |
|                            | Control      | 6.4 $\pm$ 3.2   | 0.3 $\pm$ 3.0                       |                                                  |                  |
| Folate, $\mu$ g            | Intervention | 246 $\pm$ 228   | 43 $\pm$ 244                        | 48 (-33, 129)                                    | 0.241            |
|                            | Control      | 218 $\pm$ 102   | -5 $\pm$ 83                         |                                                  |                  |

|                      |              |             |              |                          |        |
|----------------------|--------------|-------------|--------------|--------------------------|--------|
| Vitamin K, µg        | Intervention | 60 ± 78     | 35 ± 78      | 14 (-25, 52)             | 0.475  |
|                      | Control      | 48 ± 46     | 21 ± 97      |                          |        |
| Pantothenic acid, mg | Intervention | 4.0 ± 1.5   | 2.5 ± 1.7    | <b>2.4 (1.7, 3.1)</b>    | <0.001 |
|                      | Control      | 3.9 ± 1.4   | 0.1 ± 1.3    |                          |        |
| Chloride, mg         | Intervention | 267 ± 182   | 502 ± 187    | <b>450 (354, 547)</b>    | <0.001 |
|                      | Control      | 298 ± 171   | 52 ± 248     |                          |        |
| Copper, µg           | Intervention | 1131 ± 574  | 711 ± 608    | <b>653 (437, 869)</b>    | <0.001 |
|                      | Control      | 1061 ± 393  | 58 ± 328     |                          |        |
| Iodine, µg           | Intervention | 47 ± 28     | 68 ± 45      | <b>66 (48, 85)</b>       | <0.001 |
|                      | Control      | 51 ± 28     | 2 ± 39       |                          |        |
| Iron, mg             | Intervention | 11.5 ± 5.1  | 6.5 ± 5.5    | <b>6.7 (4.6, 8.8)</b>    | <0.001 |
|                      | Control      | 11.4 ± 4.9  | -0.3 ± 3.9   |                          |        |
| Magnesium, mg        | Intervention | 271 ± 104   | 81 ± 107     | <b>92 (53, 132)</b>      | <0.001 |
|                      | Control      | 275 ± 99    | -12 ± 69     |                          |        |
| Manganese, mg        | Intervention | 3.46 ± 1.83 | 1.22 ± 1.93  | <b>1.31 (0.54, 2.09)</b> | 0.001  |
|                      | Control      | 3.10 ± 1.72 | -0.10 ± 1.57 |                          |        |
| Molybdenum, µg       | Intervention | 15 ± 14     | 48 ± 20      | <b>48 (41, 55)</b>       | <0.001 |
|                      | Control      | 14 ± 9      | 0 ± 10       |                          |        |
| Phosphorus, mg       | Intervention | 1000 ± 316  | 127 ± 333    | 129 (-7, 265)            | 0.064  |
|                      | Control      | 1030 ± 338  | -1 ± 283     |                          |        |
| Potassium, mg        | Intervention | 2147 ± 821  | 536 ± 813    | <b>595 (264, 927)</b>    | 0.001  |
|                      | Control      | 2293 ± 829  | -60 ± 688    |                          |        |
| Selenium, µg         | Intervention | 98 ± 35     | 33 ± 39      | <b>26 (9, 43)</b>        | 0.004  |
|                      | Control      | 99 ± 43     | 7 ± 39       |                          |        |
| Sodium, mg           | Intervention | 3033 ± 983  | 420 ± 1548   | 409 (-292, 1109)         | 0.249  |
|                      | Control      | 3297 ± 1023 | 12 ± 1640    |                          |        |

|          |              |           |            |                       |                  |
|----------|--------------|-----------|------------|-----------------------|------------------|
| Zinc, mg | Intervention | 8.0 ± 3.0 | 5.3 ± 3.7  | <b>5.4 (3.9, 6.9)</b> | <b>&lt;0.001</b> |
|          | Control      | 8.1 ± 2.8 | -0.1 ± 3.1 |                       |                  |

---

RE, retinol equivalents;  $\alpha$ -TE, alpha-tocopherol equivalents; NE, niacin equivalents; CI, confidence interval. Data are presented as mean  $\pm$  SD. Bold values represented  $p < 0.05$ . <sup>a</sup>Represents group difference (intervention group minus control group) in 12-week change estimate (12-week minus baseline). Estimated mean (95% CI) was derived from independent sample *t*-test.
